# Supplementary material for: Heteropolyacid generated on the surface of iron phosphate nanotubes: structure and catalytic activity studies
Source: Royal Society of Chemistry journal article supplement (doi:10.1039/c5ra11175g), 2015-01-01
Supplement: c5ra11175g1.pdf [file c5ra11175g1.pdf]

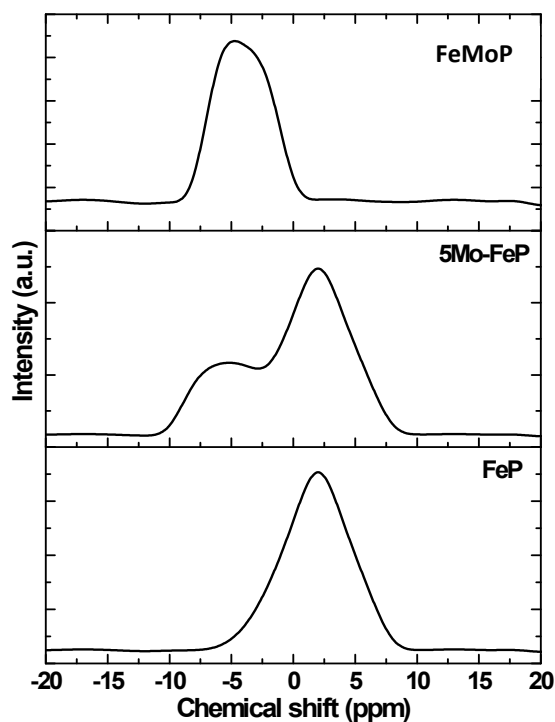

Fig. S1:  $^{31}\text{P}$  MAS NMR spectra of representative samples

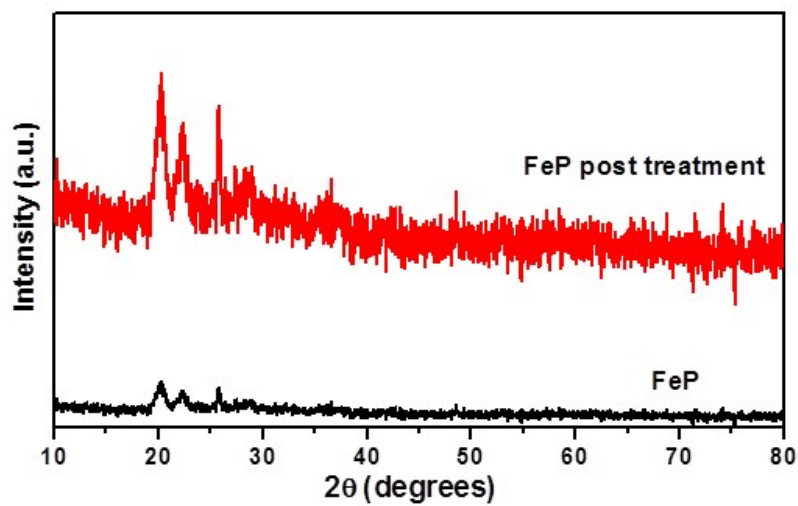

Fig. S2: XRD patterns of FeP and FeP-post treatment samples

**Table S1:** Chemical composition of samples

| Catalyst | Elemental (ICP-MS) analysis (molar %) |      |     |
|----------|---------------------------------------|------|-----|
|          | Fe                                    | P    | Mo  |
| FeP      | 36.9                                  | 20.4 | 0.0 |
| 1Mo-FeP  | 36.7                                  | 20.3 | 0.5 |
| 2Mo-FeP  | 36.4                                  | 20.4 | 1.5 |
| 3Mo-FeP  | 36.2                                  | 20.2 | 2.3 |
| 4Mo-FeP  | 36.1                                  | 20.1 | 3.5 |
| 5Mo-FeP  | 35.6                                  | 20.0 | 4.4 |

**Table S2:** Activation energies ( $E_a$ ) and TOF for the catalytic reaction conducted over different catalysts

| Catalyst                       | $E_a$<br>(kJ mol <sup>-1</sup> ) | TOF X 10 <sup>2</sup><br>(h <sup>-1</sup> ) |
|--------------------------------|----------------------------------|---------------------------------------------|
| FeP                            | 78.6                             | 9.5                                         |
| 1Mo-FeP                        | 69.3                             | 15.3                                        |
| 2Mo-FeP                        | 66.6                             | 38.6                                        |
| 3Mo-FeP                        | 62.3                             | 43.5                                        |
| 4Mo-FeP                        | 59.8                             | 63.0                                        |
| 5Mo-FeP                        | 50.5                             | 93.3                                        |
| <b>FeMoP</b>                   | <b>64.4</b>                      | <b>31.2</b>                                 |
| Fe <sub>2</sub> O <sub>3</sub> | 71.2                             | 30.6                                        |
| MoO <sub>3</sub>               | 74.6                             | 3.2                                         |

Benzyl chloride: benzene stoichiometric ratio = 1:15 and 50 mg of catalyst

**Table S3:** Comparison of Mo-FePO<sub>4</sub> catalyst with other reported iron based catalysts

| <b>Authors</b>  | <b>Catalyst</b>                                           | <b>Reaction conditions</b> | <b>Con. of benzyl chloride (%)</b> | <b>Remarks</b>                                        |
|-----------------|-----------------------------------------------------------|----------------------------|------------------------------------|-------------------------------------------------------|
| Arafat et al.   | Fe <sub>2</sub> O <sub>3</sub> /MCM-41                    | T=80°C, Time=10 min.       | 95                                 | Leaching of active phase                              |
| Sun et al.      | Fe <sub>2</sub> O <sub>3</sub> /SBA-15                    | T=60°C, Time=20 min.       | 100                                | Role support is not clear                             |
| Leng et al.     | Fe <sub>2</sub> O <sub>3</sub> /H-modernite               | T=70°C, Time=30 min.       | 100                                | Poor stability and weak acidity                       |
| Shinde & Sawant | NiFe <sub>2</sub> O <sub>4</sub>                          | T=70°C, Time=70 min.       | 100                                | Low surface area and pore size                        |
| Koyande et al.  | Fe <sub>2</sub> O <sub>3</sub> /sulfated ZrO <sub>2</sub> | T=80°C, Time=30 min.       | 80                                 | Usage of strong mineral acid                          |
| Choudary & Jana | Fe <sub>2</sub> O <sub>3</sub> /H-ZSM-5                   | T=80°C, Time=8.5 min.      | 90                                 | A significant reaction induction period was observed. |
| Bachari et al   | Fe-HMS                                                    | T=75°C, Time=245 min.      | 50                                 | Low activity, high selectivity                        |
| Ali et al       | Fe <sub>2</sub> O <sub>3</sub> /ZrO <sub>2</sub> (nano)   | T=75°C, Time=480 min.      | 91                                 | Stable activity and reusability                       |
| Present work    | MoO <sub>x</sub> -FePO <sub>4</sub>                       | T=80°C, Time=45 min.       | 100                                | Stable activity and reusability                       |
